# Supplementary material
Source: MDPI journal article supplement (https://www.mdpi.com/2079-6412/11/12/1485)
Supplement: s1 [file s1]

# Electrical Properties in Ta<sub>2</sub>NiSe<sub>5</sub> Film and van der Waals Heterojunction

Masaya Fukai <sup>1</sup>, Noriyuki Urakami <sup>1,2,\*</sup>, and Yoshio Hashimoto <sup>1,2</sup>

<sup>1</sup> Department of Electrical and Computer Engineering, Faculty of Engineering, Shinshu University, 4-17-1 Wakasato, Nagano 380-8533, Japan; 20w2077F@shinshu-u.ac.jp (M.F.); hashimt@shinshu-u.ac.jp (Y.H.)

<sup>2</sup> Research Initiative for Supra-Materials, Shinshu University, 4-17-1 Wakasato, Nagano 380-8533, Japan

\* Correspondence: urakami@shinshu-u.ac.jp

## Crystal structure and band diagram

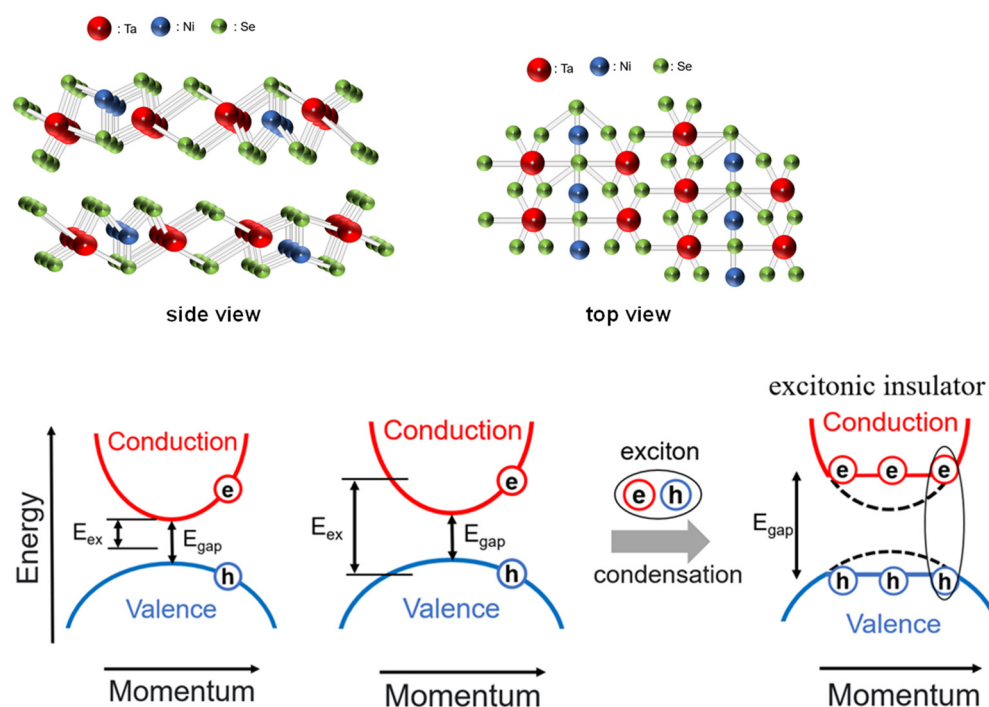

Figure S1. Crystal structure and band diagram of layered Ta<sub>2</sub>NiSe<sub>5</sub>.

## XPS analysis

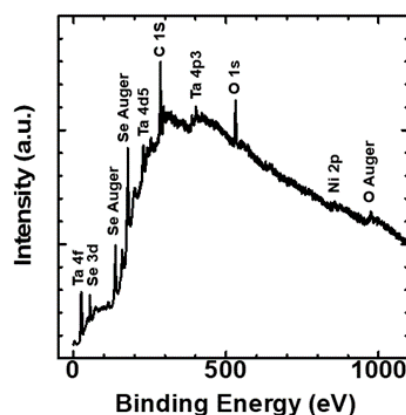

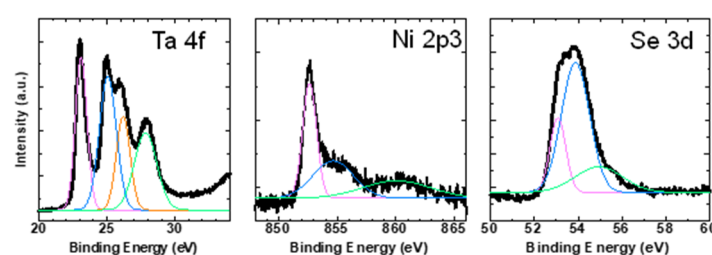

**Figure S2.** The chemical bond state was characterized by X-ray photoelectron spectroscopy (PHI Quantera IITM, ULVAC-PHI Inc.). Whole XPS spectrum of synthesized  $\text{Ta}_2\text{NiSe}_5$  flakes. The spectrum was calibrated using the O 1s peak position (531 eV). Ta 4f, Ni 2p and Se 3d core signals of XPS analysis for synthesized  $\text{Ta}_2\text{NiSe}_5$  flakes are shown.

### Back gate device

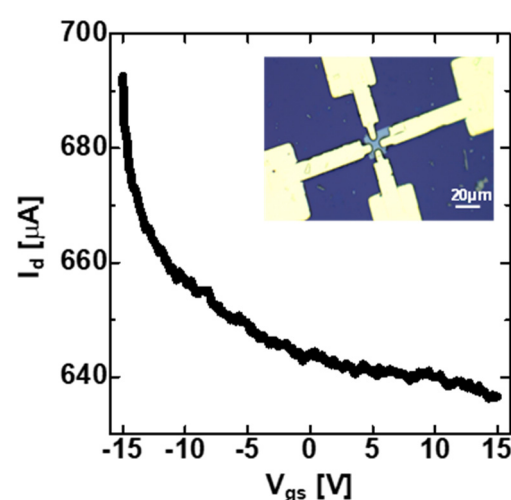

**Figure S3.** Transfer characteristic of back-gate  $\text{Ta}_2\text{NiSe}_5$  field-effect device.

### Heterojunction and analysis of transport characteristics

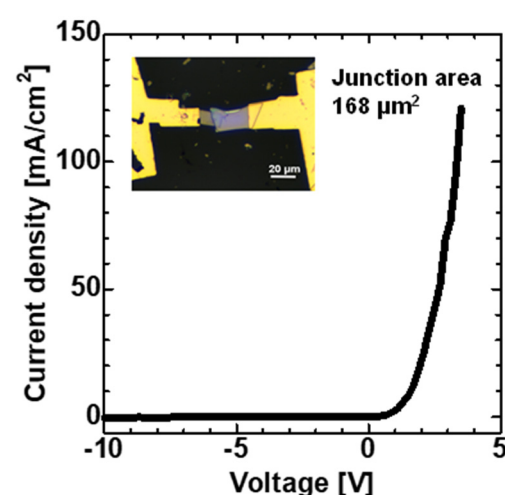

**Figure S4.** Current density-voltage (J-V) curve of the  $\text{MoS}_2/\text{Ta}_2\text{NiSe}_5$  heterojunction with incomplete interface. The bias voltage was applied to the  $\text{Ta}_2\text{NiSe}_5$  contact with respect to  $\text{MoS}_2$  contact. The interface of incomplete heterojunction includes the van der Waals gap as a thin insulator, leading to the predominant carrier transport by the tunneling mechanism, and a high turn-on voltage.

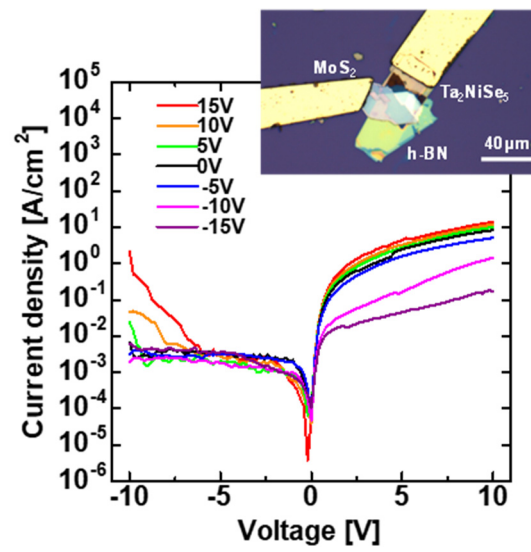

**Figure S5.** J-V curve of the MoS<sub>2</sub>/h-BN/Ta<sub>2</sub>NiSe<sub>5</sub> heterojunction with incomplete interface. The maximum on/off ratio was 1610 when the gate bias voltage corresponds to be -5 V.
