# Supplementary material
Source: MDPI journal article supplement (https://www.mdpi.com/2079-6412/11/12/1485)
Supplement: s1 [file s1]

Archive with 1 entries (1 files):
- coatings-1474692-supplementary.pdf
